# Supplementary material for: Why does B2O3 suppress nepheline (NaAlSiO4) crystallization in sodium aluminosilicate glasses?
Source: Royal Society of Chemistry journal article supplement (doi:10.1039/d0cp00172d), 2020-01-01
Supplement: d0cp00172d1.pdf [file d0cp00172d1.pdf]

## Supporting Information

Why does  $B_2O_3$  suppress nepheline ( $NaAlSiO_4$ ) crystallization in  
aluminosilicate glasses?

Ambar Deshkar,<sup>1</sup> Ozgur Gulbiten,<sup>2</sup> Randall E. Youngman,<sup>2</sup> John C. Mauro,<sup>3</sup>

Ashutosh Goel<sup>1,\*</sup>

<sup>1</sup> Department of Materials Science and Engineering, Rutgers, The State University of New  
Jersey, Piscataway, NJ 08854-8065, United States

<sup>2</sup> Science and Technology Division, Corning Incorporated, Corning, NY 14831, United States

<sup>3</sup> Department of Materials Science and Engineering, The Pennsylvania State University,  
University Park, PA 16802, United States of America

---

\* Corresponding author

Email: [ag1179@soe.rutgers.edu](mailto:ag1179@soe.rutgers.edu); Ph: +1-848-445-4512

**Table S1.** Viscosities of melts of BL, SB-10, SB-20, BA-10 and BA-20 compositions as a function of temperature.

| BL     |                           | SB-10  |                           | SB-20  |                           | BA-10  |                           | BA-20  |                           |
|--------|---------------------------|--------|---------------------------|--------|---------------------------|--------|---------------------------|--------|---------------------------|
| T (K)  | $\log_{10}\eta$<br>(Pa.s) |
| 1927.1 | 1.078                     | 1863.1 | 0.561                     | 1617.4 | 0.866                     | 1670.4 | 1.1157                    | 1573.0 | 0.139                     |
| 1927.1 | 1.078                     | 1769.1 | 0.937                     | 1580.2 | 1.049                     | 1671.5 | 1.135                     | 1534.7 | 0.266                     |
| 1907.7 | 1.161                     | 1769.7 | 0.939                     | 1580.3 | 1.0492                    | 1632.9 | 1.2353                    | 1495.1 | 0.341                     |
| 1907.7 | 1.161                     | 1721.4 | 1.147                     | 1541.9 | 1.204                     | 1632.9 | 1.2396                    | 1455.6 | 0.469                     |
| 1888.3 | 1.249                     | 1721.6 | 1.146                     | 1541.6 | 1.209                     | 1593.8 | 1.3712                    | 1416.0 | 0.584                     |
| 1888.3 | 1.248                     | 1673.0 | 1.382                     | 1503.0 | 1.394                     | 1593.8 | 1.3822                    | 1336.4 | 0.868                     |
| 1863.2 | 1.362                     | 1673.1 | 1.386                     | 1503.0 | 1.396                     | 1551.3 | 1.5089                    | 1296.7 | 1.049                     |
| 1863.2 | 1.359                     | 1624.  | 1.601                     | 1463.8 | 1.568                     | 1551.4 | 1.51                      | 1296.7 | 1.043                     |
| 1843.3 | 1.455                     | 1624.7 | 1.604                     | 1463.7 | 1.566                     | 1511.1 | 1.6554                    | 1256.7 | 1.143                     |
| 1843.3 | 1.452                     | 1576.7 | 1.864                     | 1424.3 | 1.770                     | 1510.9 | 1.6568                    | 1256.7 | 1.144                     |
| 1823.5 | 1.551                     | 1576.7 | 1.863                     | 1424.2 | 1.767                     | 1470.6 | 1.8077                    | 1216.7 | 1.486                     |
| 1823.5 | 1.551                     | 1537.3 | 2.109                     | 1385.0 | 1.997                     | 1470.7 | 1.8081                    | 1216.7 | 1.478                     |
| 1803.5 | 1.655                     | 1537.3 | 2.107                     | 1384.9 | 1.999                     | 1430.8 | 1.9707                    | 1176.6 | 1.767                     |
| 1803.5 | 1.657                     | 1476.1 | 2.552                     | 1345.4 | 2.239                     | 1430.7 | 1.9701                    | 1176.5 | 1.762                     |
| 1783.9 | 2.150 <sup>†</sup>        | 1478.1 | 2.548                     | 1345.4 | 2.240                     | 1391.4 | 2.1389                    | 808.1  | 11.300                    |
| 1101.3 | 11.296                    | 927.5  | 11.121                    | 1305.9 | 2.497                     | 1391.3 | 2.1359                    | 805.5  | 11.493                    |
| 1095.2 | 11.500                    | 922.8  | 11.294                    | 1305.7 | 2.504                     | 1350.1 | 2.3016                    | 799.6  | 11.910                    |
| 1089.2 | 11.705                    | 917.1  | 11.498                    | 1275.6 | 2.701                     | 1350.1 | 2.2986                    | 798.1  | 11.999                    |
| 1084.0 | 11.909                    | 911.4  | 11.699                    | 1278.5 | 2.713                     | 822.4  | 11.195                    | 807.7  | 11.319                    |
| 1080.6 | 12.006                    | 905.4  | 11.907                    | 834.5  | 11.199                    | 818.9  | 11.395                    | 805.1  | 11.508                    |
| 1103.9 | 11.198                    | 903.1  | 11.998                    | 829.9  | 11.395                    | 815.0  | 11.617                    | 802.4  | 11.699                    |
| 1098.0 | 11.396                    | 925.6  | 11.196                    | 824.8  | 11.605                    | 811.6  | 11.808                    | 799.5  | 11.909                    |
| 1091.7 | 11.607                    | 920.0  | 11.394                    | 820.2  | 11.807                    | 808.2  | 12.002                    |        |                           |
| 1086.6 | 11.807                    | 914.4  | 11.594                    | 832.0  | 11.302                    | 822.1  | 11.198                    |        |                           |
|        |                           | 908.5  | 11.802                    | 827.9  | 11.492                    | 818.9  | 11.394                    |        |                           |
|        |                           | 903.0  | 12.01                     | 822.9  | 11.703                    | 814.7  | 11.616                    |        |                           |
|        |                           |        |                           | 818.5  | 11.912                    | 811.3  | 11.806                    |        |                           |
|        |                           |        |                           | 816.2  | 11.999                    | 807.4  | 12.015                    |        |                           |

<sup>†</sup> In case of BL, the viscosity at 1783.9 K was not found to gradually increase with time instead of stabilizing, indicating crystallization

**Table S2.** Viscosity of melts with NaAlSiO<sub>4</sub> or near-NaAlSiO<sub>4</sub> compositions obtained from literature

| NaAlSiO <sub>4</sub> from Le Losq et al. <sup>1</sup> |                        | Toplis et al. NAS50:49 <sup>2</sup> |                        | Toplis et al. NAS50:51 <sup>2</sup> |                        |
|-------------------------------------------------------|------------------------|-------------------------------------|------------------------|-------------------------------------|------------------------|
| T, K                                                  | $\log_{10}\eta$ (Pa.s) | T, K                                | $\log_{10}\eta$ (Pa.s) | T, K                                | $\log_{10}\eta$ (Pa.s) |
| 1058.9                                                | 12.57                  | 1164.4                              | 9.46                   | 1162.9                              | 8.99                   |
| 1072.5                                                | 12.04                  | 1147.4                              | 9.98                   | 1138.2                              | 9.57                   |
| 1085.4                                                | 11.59                  | 1125.0                              | 10.72                  | 1120.4                              | 10.05                  |
| 1093.2                                                | 11.33                  | 1117.9                              | 10.78                  | 1102.5                              | 10.73                  |
| 1102.1                                                | 11.09                  | 1100.9                              | 11.4                   | 1919.1                              | 1.117                  |
| 1110.7                                                | 10.79                  | 1919.1                              | 1.118                  | 1894.1                              | 1.226                  |
| 1121.1                                                | 10.5                   | 1894.1                              | 1.229                  | 1869.1                              | 1.341                  |
| 1134.3                                                | 10.12                  | 1869.1                              | 1.345                  | 1845.1                              | 1.456                  |
| 1150.7                                                | 9.72                   | 1845.1                              | 1.46                   | 1820.1                              | 1.579                  |
| 1172.5                                                | 9.26                   | 1820.1                              | 1.586                  |                                     |                        |

**Table S3.**  $^{23}\text{Na}$  and  $^{27}\text{Al}$  chemical shift ( $\delta_{\text{CS}}$ ), quadrupolar coupling product ( $P_{\text{Q}}$ ) and quadrupolar coupling constant ( $C_{\text{Q}}$ ) parameters

|       | $^{23}\text{Na}$ MAS NMR   |                      | $^{27}\text{Al}$ MAS NMR   |                      |
|-------|----------------------------|----------------------|----------------------------|----------------------|
|       | $\delta_{\text{CS}}$ (ppm) | $P_{\text{Q}}$ (MHz) | $\delta_{\text{CS}}$ (ppm) | $C_{\text{Q}}$ (MHz) |
| BL    | -4.1                       | 1.75                 | 65.8                       | 5.4                  |
| SB-10 | -4.4                       | 1.67                 | 65.8                       | 5.4                  |
| SB-20 | -4.2                       | 1.53                 | 64.7                       | 5.2                  |
| BA-10 | -3.8                       | 1.75                 | 63.7                       | 4.7                  |
| BA-20 | -3.5                       | 1.90                 | 63.1                       | 4.8                  |

**Table S4.**  $^{23}\text{Na}$  chemical shifts ( $\delta_{\text{CS}}$ ) and quadrupolar coupling product ( $P_{\text{Q}}$ ) parameters from MQMAS NMR data

|                   | Crystalline sites |                            |                      | Residual glass             |                      |
|-------------------|-------------------|----------------------------|----------------------|----------------------------|----------------------|
|                   |                   | $\delta_{\text{CS}}$ (ppm) | $P_{\text{Q}}$ (MHz) | $\delta_{\text{CS}}$ (ppm) | $P_{\text{Q}}$ (MHz) |
| BL 950C<br>24h    | Site 1            | 11.0                       | 1.9                  | --                         | --                   |
|                   | Site 2            | 6.3                        | 2.3                  |                            |                      |
|                   | Site 3            | 5.4                        | 2.1                  |                            |                      |
|                   | Site 4            | -1.8                       | 1.5                  |                            |                      |
| SB-10<br>950C 24h | Site 1            | 6.3                        | 1.8                  | --                         | --                   |
|                   | Site 2            | 5.3                        | 1.6                  |                            |                      |
|                   | Site 3            | 4.3                        | 1.6                  |                            |                      |
|                   | Site 4            | -1.4                       | 1.5                  |                            |                      |
|                   | Site 5            | -3.4                       | 1.5                  |                            |                      |
|                   | Site 6            | -11.6                      | 0.7                  |                            |                      |
|                   | Site 7            | -13.3                      | 0.8                  |                            |                      |
| SB-20<br>950C 24h | Site 1            | 5.9                        | 1.6                  | --                         | --                   |
|                   | Site 2            | 0.1                        | 1.5                  |                            |                      |
|                   | Site 3            | -1.7                       | 1.5                  |                            |                      |
|                   | Site 4            | -9.9                       | 0.7                  |                            |                      |
|                   | Site 5            | -11.6                      | 0.8                  |                            |                      |
| BL 850C<br>24h    | Site 1            | 5.7                        | 2.06                 | -3.7                       | 1.70                 |
|                   | Site 2            | -2.2                       | 1.77                 |                            |                      |
| BA-10<br>850C 24h | Site 1            | -5.4                       | 2.01                 | -3.3                       | 1.12                 |
|                   | Site 2            | -19.2                      | 1.53                 |                            |                      |
| BA-20<br>850C 24h |                   | --                         | --                   | -3.5                       | 1.99                 |

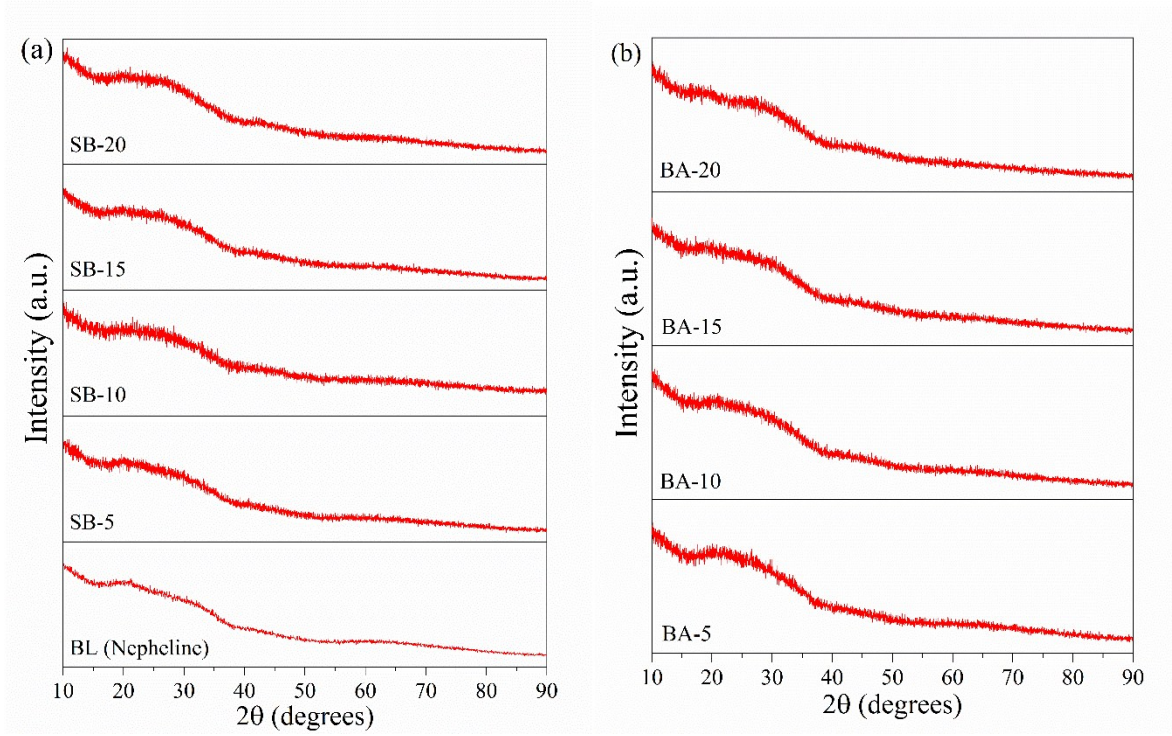

**Figure S1.** X-ray diffractograms of glasses of (a) SB-series and (b) BA-series

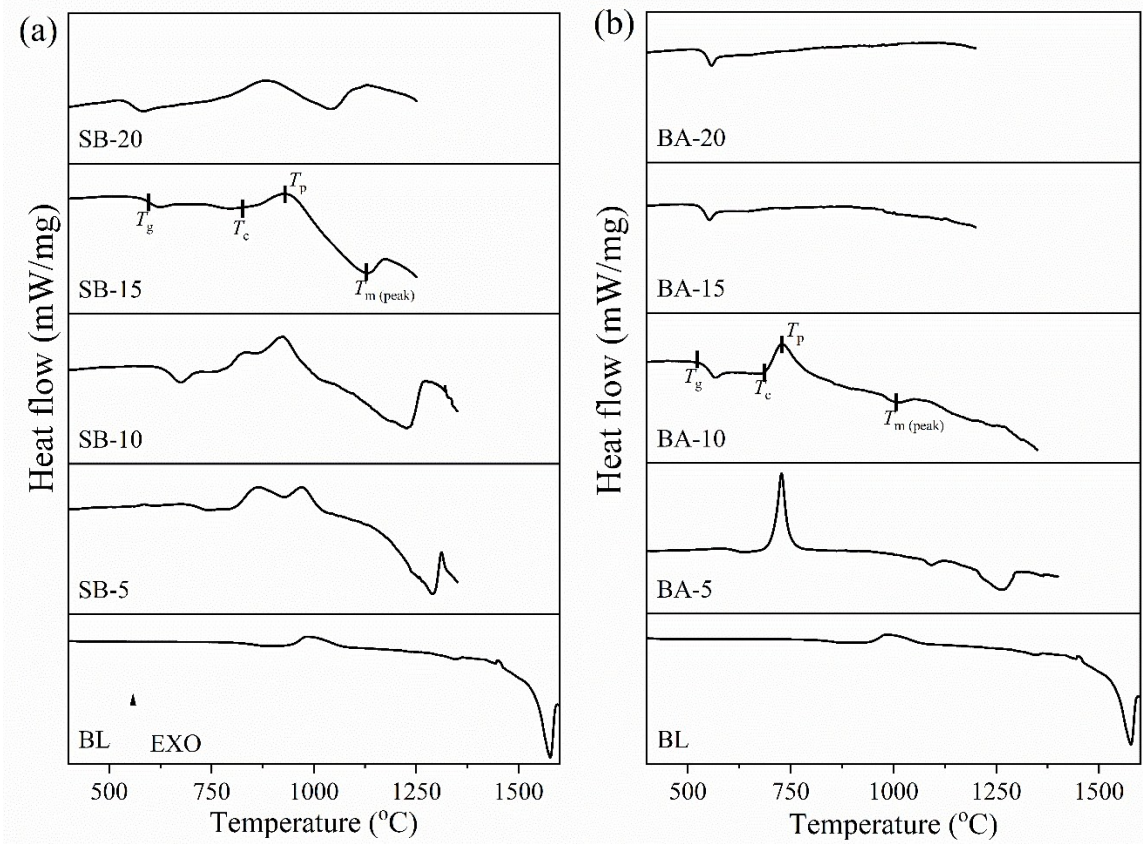

**Figure S2.** DSC scans of glasses of (a) SB-series and (b) BA-series

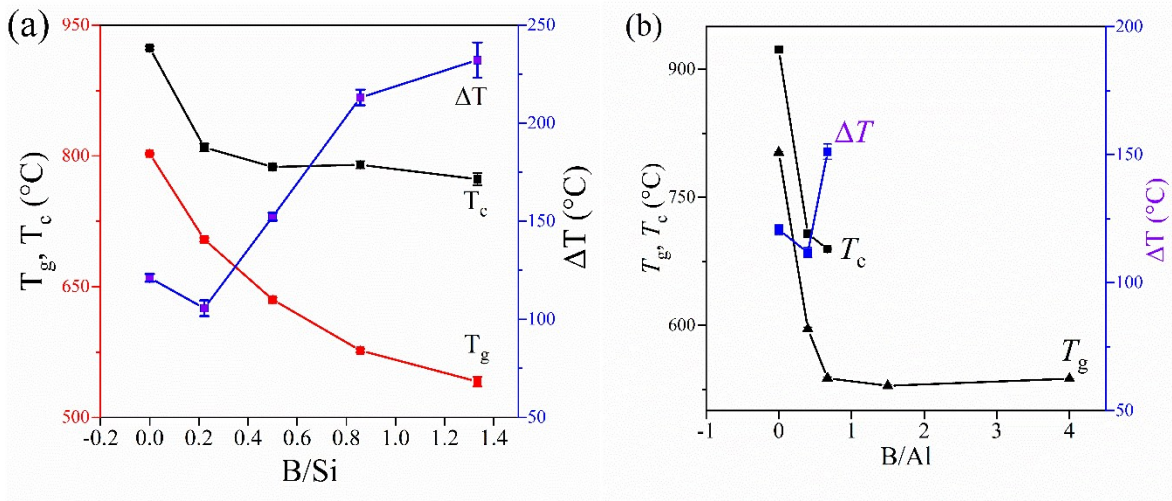

**Figure S3.**  $T_g$ ,  $T_c$  and  $\Delta T$  values vs. mol.%  $B_2O_3$  for (a) SB-series and (b) BA-series glasses obtained from thermal analysis at 10 K/min.

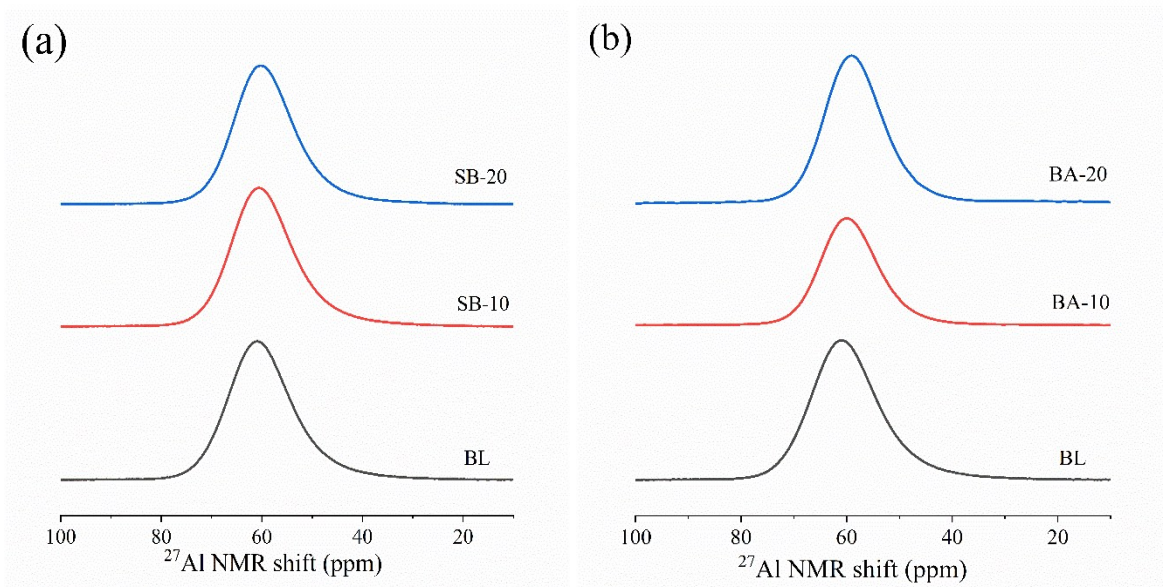

**Figure S4.**  $^{27}\text{Al}$  MAS NMR spectra (a) SB-series and (b) BA-series glasses



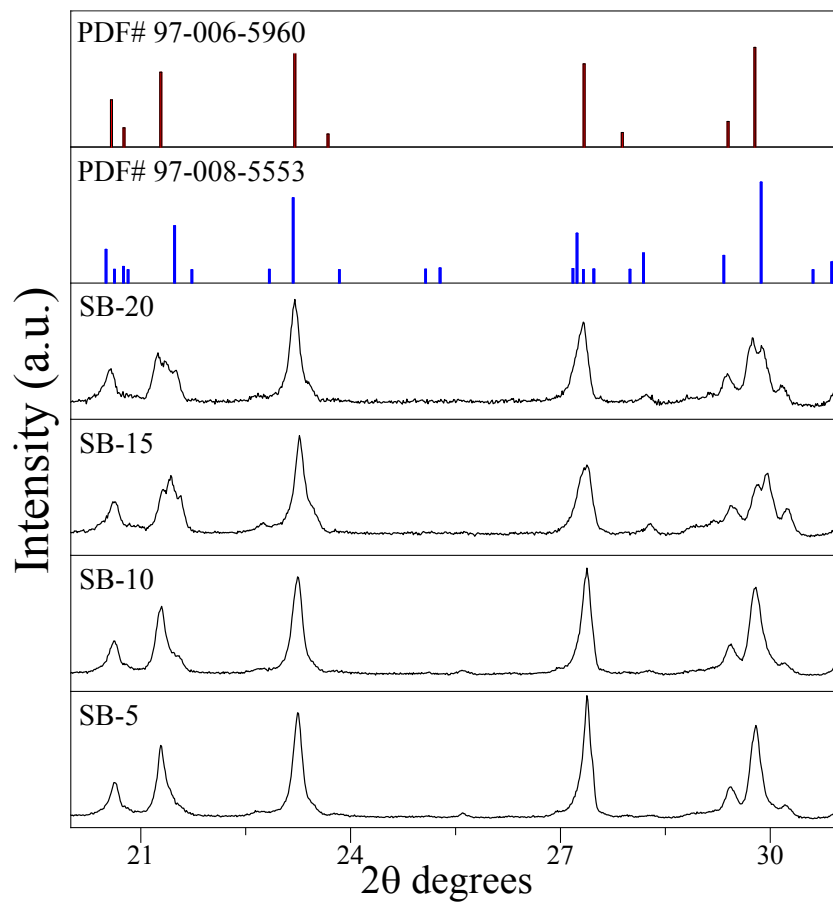

**Figure S5.** XRD diffractograms of isothermally heat-treated SB-series glass-ceramics and comparison with different crystal phases of nepheline - PDF#97-008-5553 and PDF# 97-006-5960 within the  $2\theta$  range of  $19^\circ$  to  $31^\circ$

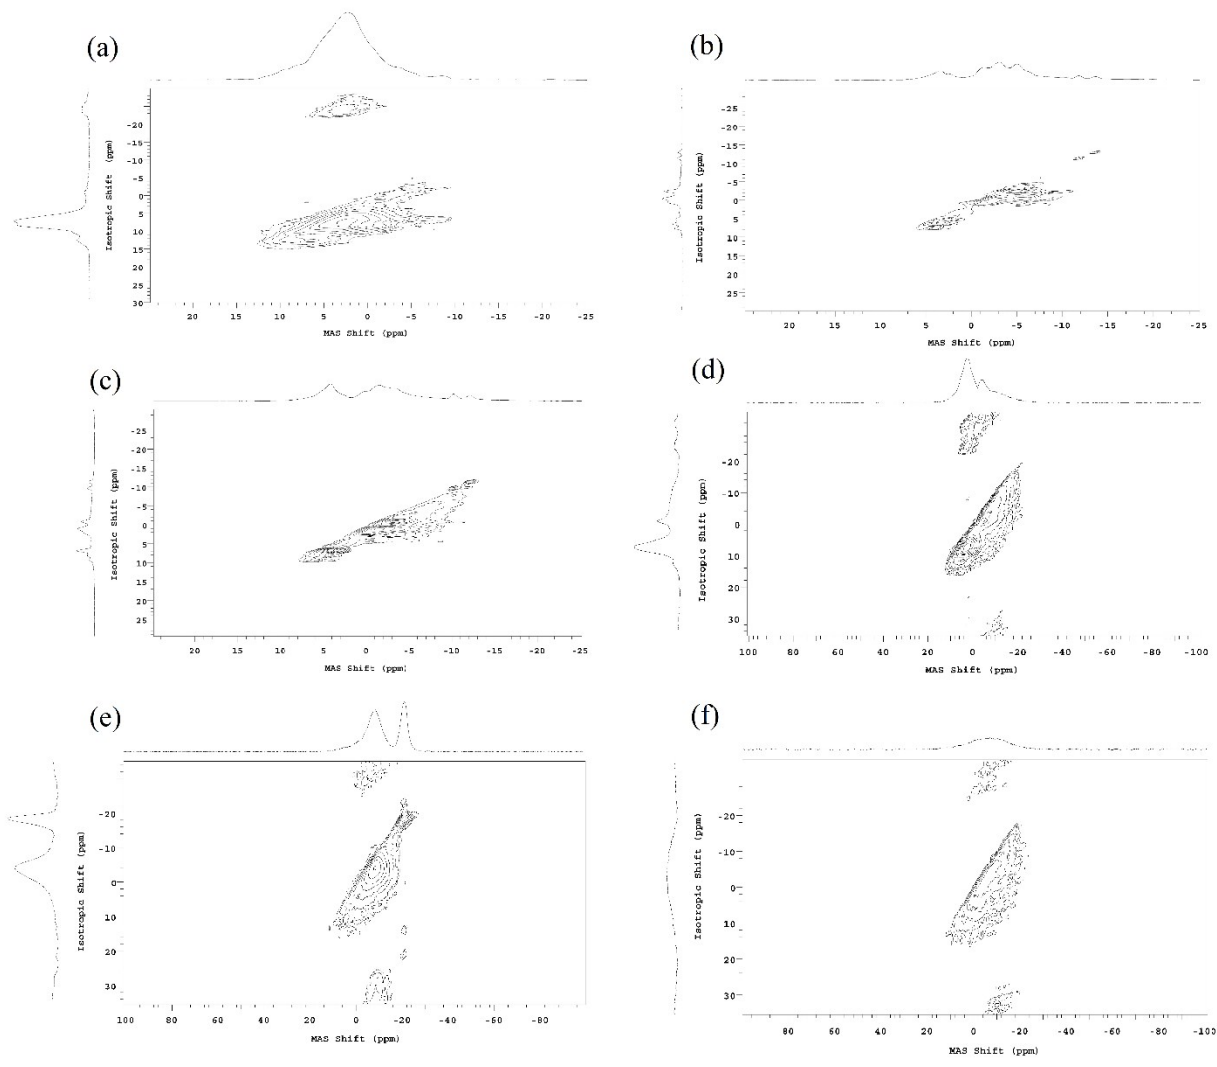

**Figure S6.** 2D  $^{23}\text{Na}$  MQMAS NMR spectra of isothermally heat-treated glass-ceramics- (a)BL 950 °C 24h, (b) SB-10 950 °C 24h, (c) SB-20 950 °C 24h, (d) BL 850 °C 24h (e) BA-10 850 °C 24h and (f) BA-20 850 °C 24h

## References

1. C. Le Losq, D. R. Neuville, W. Chen, P. Florian, D. Massiot, Z. Zhou, and G. N. Greaves, *Sci. Rep.*, 2017, **7**, 16490.
2. M. J. Toplis, D. B. Dingwell, K.-U. Hess, and T. Lenci, *Am. Mineral.*, 1997, **82**, 979-90.
